# Supplementary material for: Surface oxygen species essential for the catalytic activity of Ce–M–Sn (M = Mn or Fe) in soot oxidation
Source: Royal Society of Chemistry journal article supplement (doi:10.1039/d0cy02077j), 2020-11-24
Supplement: d0cy02077j1.pdf [file d0cy02077j1.pdf]

## Surface Oxygen Species Essential for the Catalytic Activity of Ce-M-Sn (M = Mn, or Fe) in Soot Oxidation

Meng Wang<sup>a, d</sup>, Yan Zhang<sup>a, b, \*</sup>, Yunbo Yu<sup>a, c, d</sup>, Wenpo Shan<sup>a, b</sup> Hong He<sup>a, c, d</sup>

<sup>a</sup> Center for Excellence in Regional Atmospheric Environment, Institute of Urban Environment, Chinese Academy of Sciences, Xiamen 361021, China

<sup>b</sup> Ningbo Urban Environment Observation and Research Station, Institute of Urban Environment, Chinese Academy of Sciences, Ningbo 315800, China

<sup>c</sup> State Key Joint Laboratory of Environment Simulation and Pollution Control, Research Center for Eco-Environmental Sciences, Chinese Academy of Sciences, Beijing 100085, China

<sup>d</sup> University of Chinese Academy of Sciences, Beijing 100049, China

\* Corresponding Author: Yan Zhang (E-mail: [yzhang3@iue.ac.cn](mailto:yzhang3@iue.ac.cn))

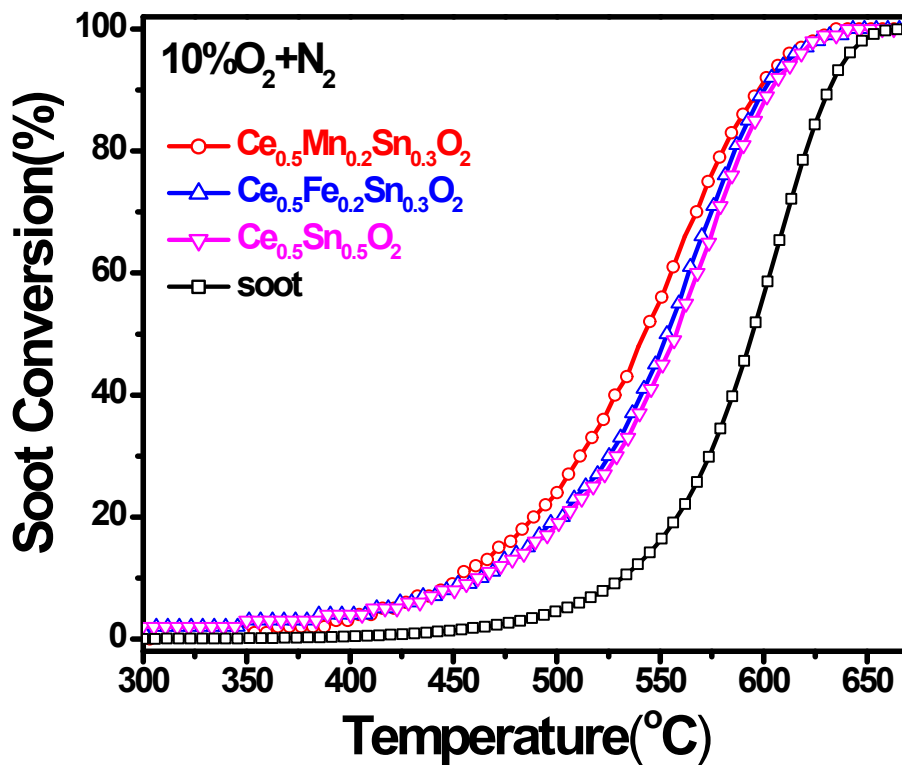

**Figure S1.** Soot conversion of the as-prepared catalysts during the temperature-programmed oxidation. Reaction conditions: 10% O<sub>2</sub> balanced by N<sub>2</sub>, GHSV 300,000 ml·g<sup>-1</sup>·h<sup>-1</sup> (heating rate = 10 °C/min).

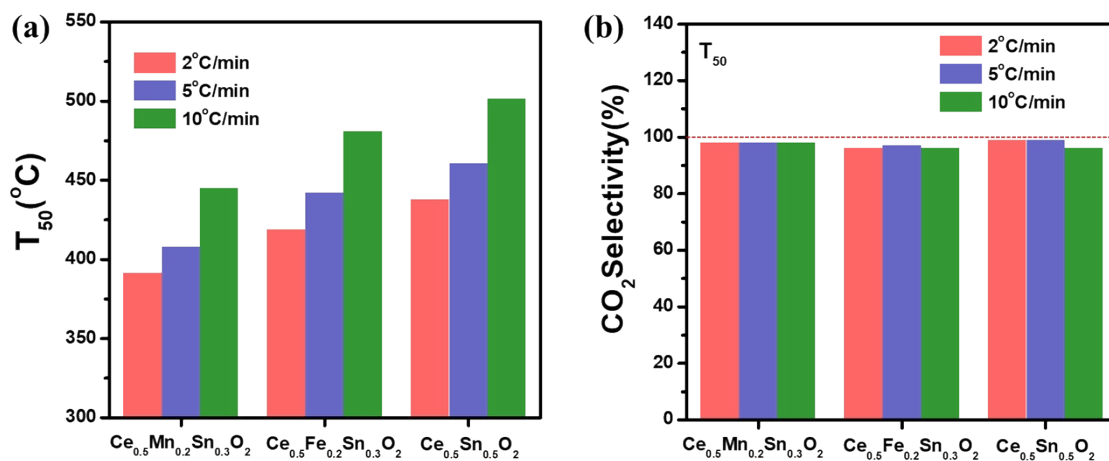

**Figure S2.** Soot conversion of the as-prepared catalysts during temperature-programmed oxidation under the different heating rate. Reaction conditions: 0.1% NO and 10% O<sub>2</sub> balanced by N<sub>2</sub>, GHSV 300,000 ml·g<sup>-1</sup>·h<sup>-1</sup>.

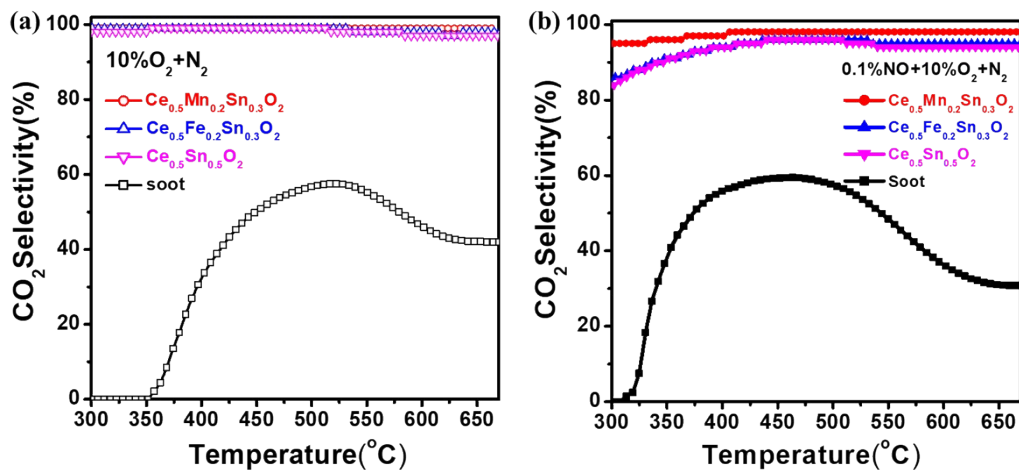

**Figure S3.** CO<sub>2</sub> selectivity of the as-prepared catalysts during the temperature-programmed oxidation in different reactant gas, GHSV 300,000 ml·g<sup>-1</sup>·h<sup>-1</sup> (heating rate=10°C/min). **(a)** 10% O<sub>2</sub> balanced by N<sub>2</sub>, **(b)** 0.1% NO and 10% O<sub>2</sub> balanced by N<sub>2</sub>.

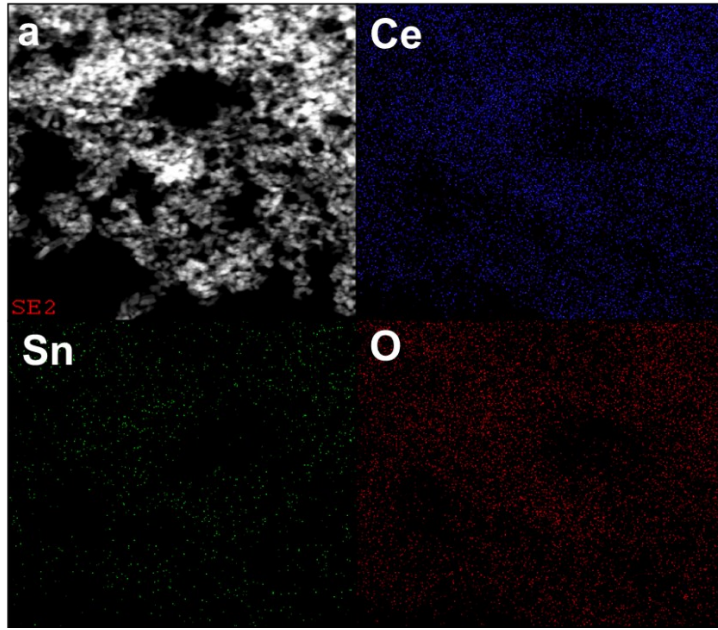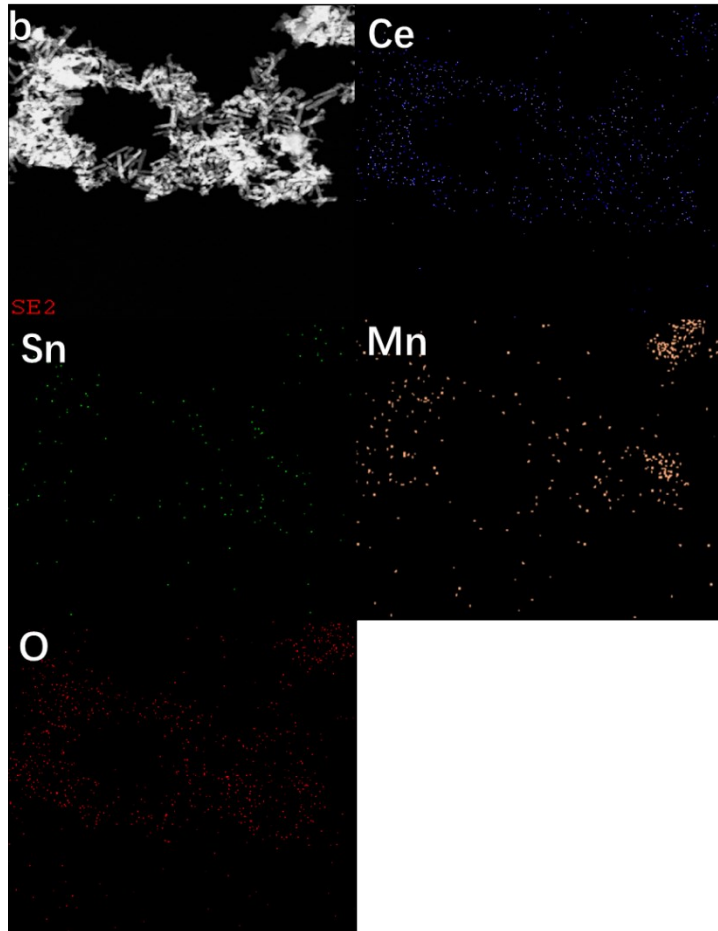

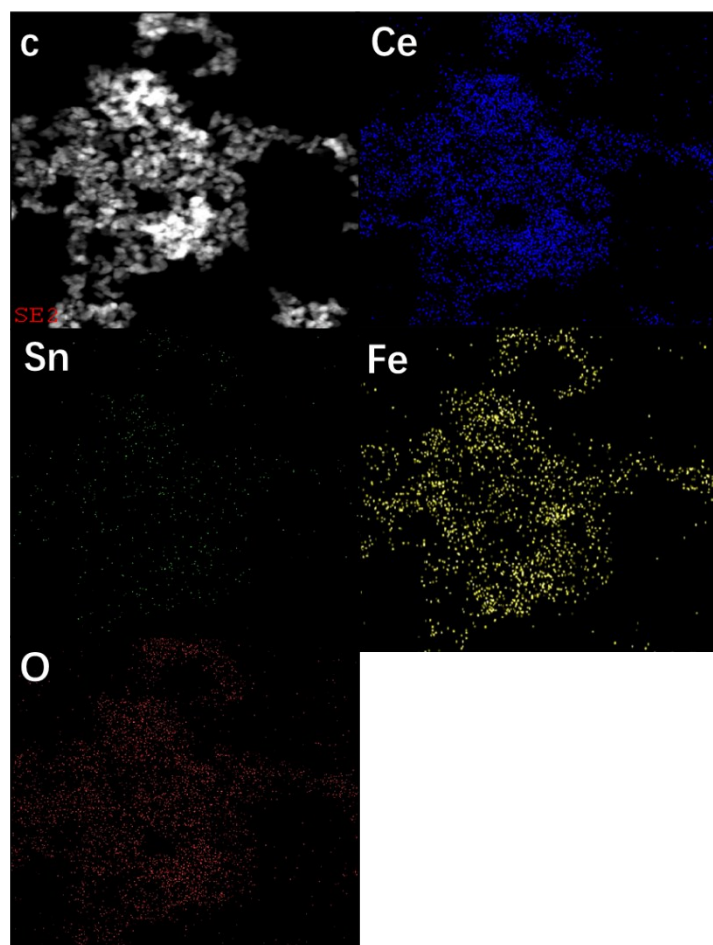

**Figure S4.** Element mapping results from EDS of (a)  $\text{Ce}_{0.5}\text{Sn}_{0.5}\text{O}_2$  (b)  $\text{Ce}_{0.5}\text{Mn}_{0.2}\text{Sn}_{0.3}\text{O}_2$  (c)

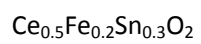

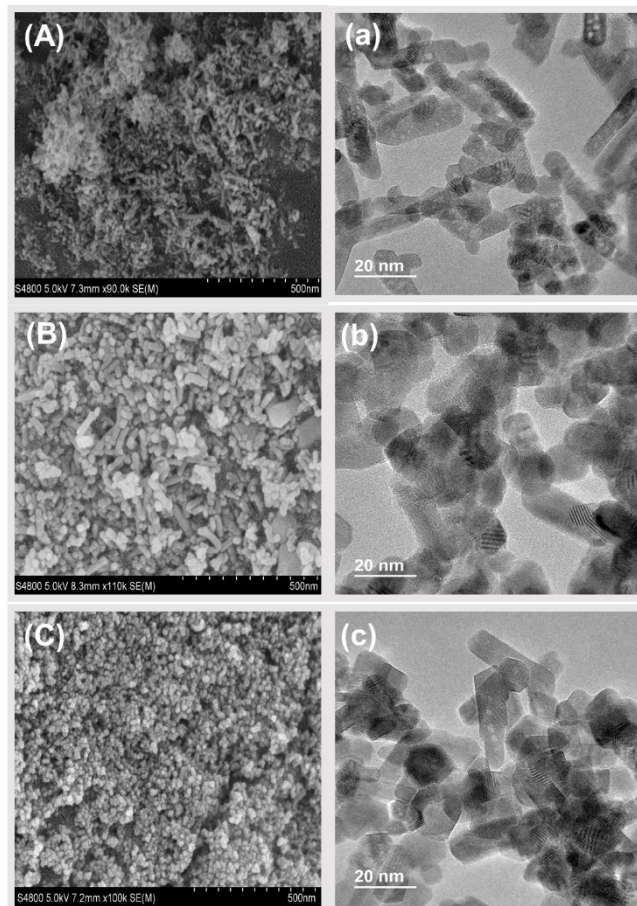

Figure S5. SEM images of the (A)  $\text{Ce}_{0.5}\text{Mn}_{0.2}\text{Sn}_{0.3}\text{O}_2$  (B)  $\text{Ce}_{0.5}\text{Fe}_{0.2}\text{Sn}_{0.3}\text{O}_2$  (C)  $\text{Ce}_{0.5}\text{Sn}_{0.5}\text{O}_2$ ; TEM

images of the (a)  $\text{Ce}_{0.5}\text{Mn}_{0.2}\text{Sn}_{0.3}\text{O}_2$  (b)  $\text{Ce}_{0.5}\text{Fe}_{0.2}\text{Sn}_{0.3}\text{O}_2$  (c)  $\text{Ce}_{0.5}\text{Sn}_{0.5}\text{O}_2$

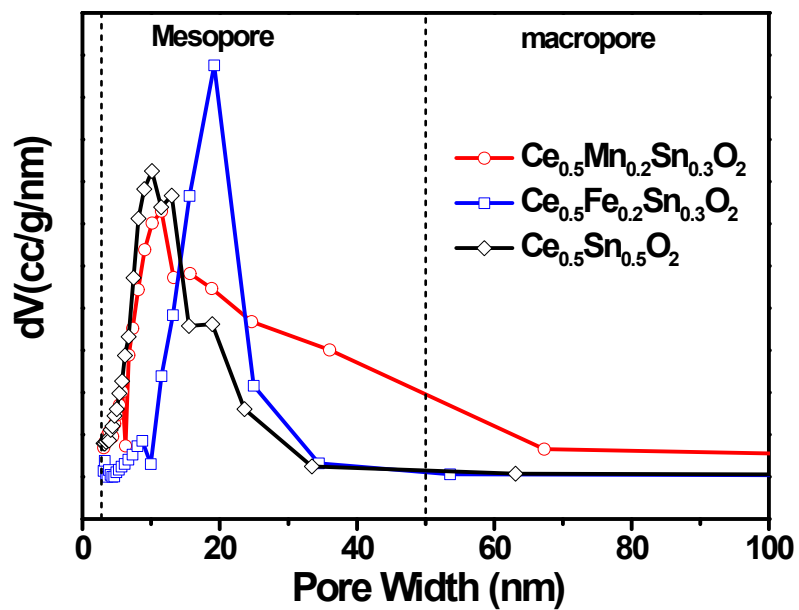

Figure S6. Pore-size distribution of the catalysts modified by Mn and Fe

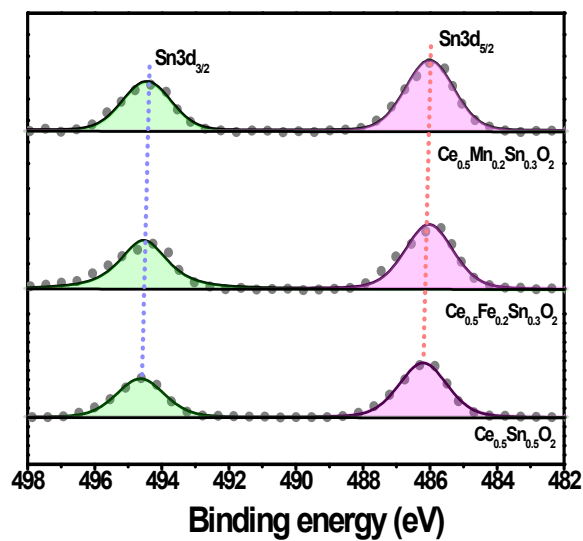

Figure S7. Sn 3d XPS spectra of the catalysts

Table S1 Textural parameters of all catalysts derived from N<sub>2</sub> physisorption results

| Sample                                                               | $S_{\text{BET}}$ (m <sup>2</sup> /g) | Pore volume(cm <sup>3</sup> /g) | Pore size (n m) |
|----------------------------------------------------------------------|--------------------------------------|---------------------------------|-----------------|
| Ce <sub>0.5</sub> Mn <sub>0.2</sub> Sn <sub>0.3</sub> O <sub>2</sub> | 86.69                                | 0.47                            | 11.52           |
| Ce <sub>0.5</sub> Fe <sub>0.2</sub> Sn <sub>0.3</sub> O <sub>2</sub> | 42.49                                | 0.25                            | 19.20           |
| Ce <sub>0.5</sub> Sn <sub>0.5</sub> O <sub>2</sub>                   | 63.28                                | 0.24                            | 10.13           |
